# Supplementary material for: Functionalised magnetic nanoparticles for uranium adsorption with ultra-high capacity and selectivity
Source: Royal Society of Chemistry journal article supplement (doi:10.1039/c7ta09240g), 2018-01-01
Supplement: c7ta09240g1.pdf [file c7ta09240g1.pdf]

# Functionalised Magnetic Nanoparticles for Uranium Adsorption with Ultra-High Capacity and Selectivity

Calli, E<sup>1,2</sup>.; Qi, J<sup>1</sup>.; Preedy, O.<sup>3</sup>; Chen, S.<sup>4</sup>; Boldrin, D.<sup>5</sup>;  
Branford, W. R.<sup>2,5</sup>; Vandeperre, L.<sup>1</sup>; Ryan, M. P.<sup>1,2</sup>

<sup>1</sup> Department of Materials, Imperial College London, Exhibition Road, London SW7 2AZ, United Kingdom.

<sup>2</sup> London Centre for Nanotechnology, Imperial College London, Exhibition Road, London SW7 2AZ, United Kingdom.

<sup>3</sup> Department of Chemistry, Loughborough University, Loughborough LE11 3TU, United Kingdom.

<sup>4</sup> Department of Biological Sciences, Birkbeck, University of London, WC1E 7HX, United Kingdom.

<sup>5</sup> Department of Physics, Imperial College London, Exhibition Road, London SW7 2AZ, United Kingdom.

## Electronic Supportive Information

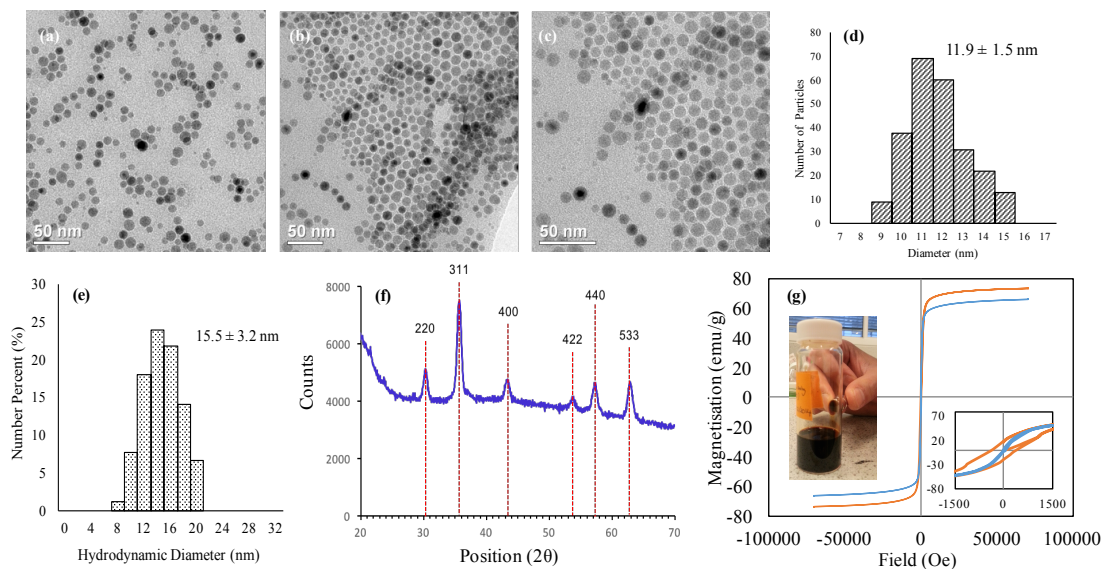

Figure S1: Characterisation of as-synthesised oleic acid-functionalised 12 nm Fe<sub>3</sub>O<sub>4</sub> NPs. (a), (b), (c) TEM micrographs of 12 nm oleic acid capped-Fe<sub>3</sub>O<sub>4</sub> nanoparticles; (d) size distribution obtained through ImageJ software; (e) size distribution of 12 nm oleic acid capped-Fe<sub>3</sub>O<sub>4</sub> obtained from DLS. The larger value compared to TEM results is given by the inclusion of the oleic acid molecule's size (~2 nm) attached on the surface of the particles; (f) XRD pattern at  $2\theta$  angle of the OA-Fe<sub>3</sub>O<sub>4</sub> NPs marking magnetite characteristic lattice planes (Ref. Code 01-075-1610). (g) Hysteresis loop showing the sample's magnetisation *vs.* applied field curve acquired at 300 K (blue curve) and 5 K (orange curve). The inset shows hysteresis ranging from -1.5 to 1.5 kOe. The inserted picture shows magnetic attraction obtained using a NdFeB 10 mm disc magnet.

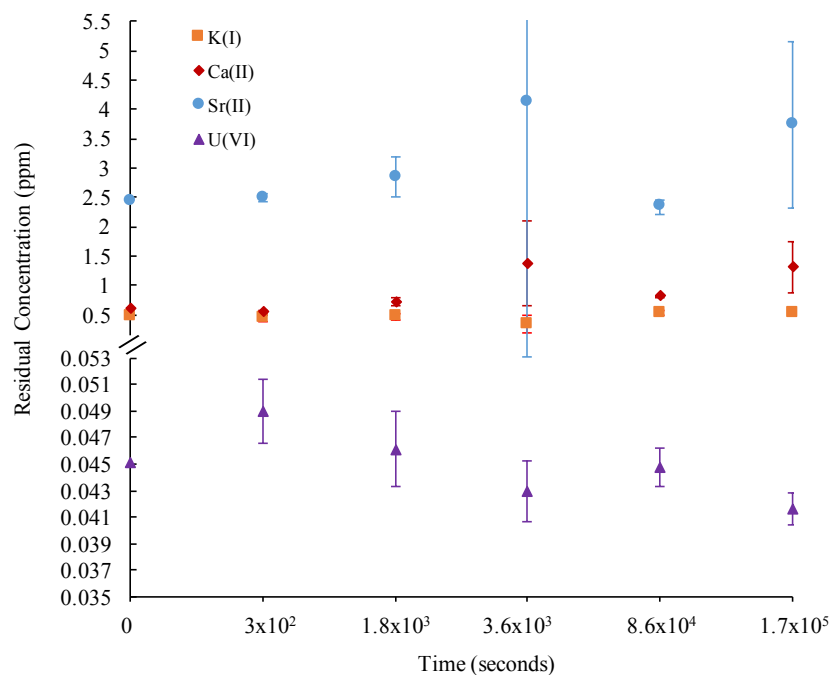

Figure S2: Adsorption of K(I), Ca(II), Sr(II) and U(VI) onto the  $(\text{PO})_x\text{-Fe}_3\text{O}_4$  NPs at alkaline conditions (pH 11). The graph was interrupted and scaled for better results appreciation, due to U(VI) initial concentration being extensively lower with respect to competing ions quantities. Contact times of 5 min, 30 min, 1 h, 24 h, 48 h were tested.

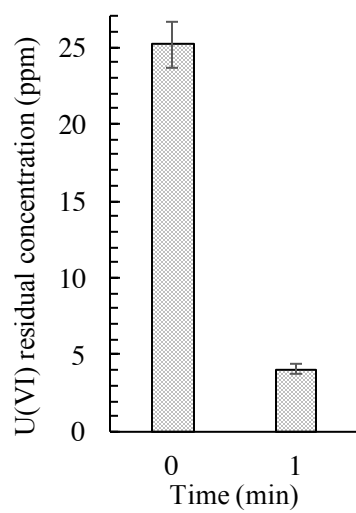

Figure S3: Evaluation of uranium uptake by 0.2 mg of  $(\text{PO})_x\text{-Fe}_3\text{O}_4$  NPs upon exposure to air. The sample was equilibrated for 1 minute prior to centrifugation and collection of the supernatant for ICP-OES analysis.
